# Supplementary material for: Mutant p53 gains oncogenic functions through a chromosomal instability-induced cytosolic DNA response
Source: PubMed Central journal article supplement (PMC10761733; doi:10.1038/s41467-023-44239-2), 2024-01-02
Supplement: 41467_2023_44239_MOESM3_ESM.pdf [file 41467_2023_44239_MOESM3_ESM.pdf]

## **Description of Additional Supplementary Files**

File Name: Supplementary Data 1

Description: G245D mutp53 interactome identified by SILAC-IP MS from 8 individual experiments

File Name: Supplementary Data 2

Description: Cell line genotype STR information

File Name: Supplementary Data 3

Description: DNA vector, primer and shRNA information

File Name: Supplementary Data 4

Description: Antibody information
